# Supplementary material
Source: PubMed Central journal article supplement (PMC3514884)

Figure S1

**A** Lymph Node

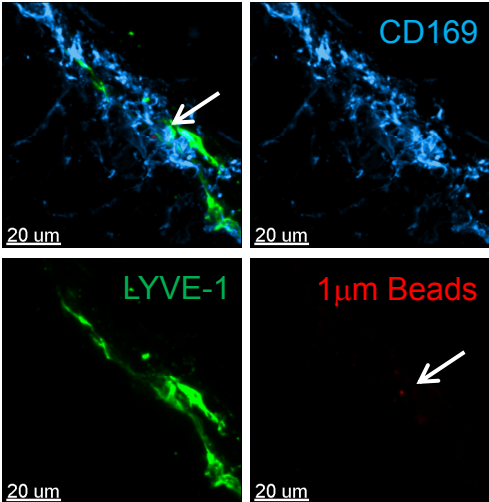

**B** Spleen

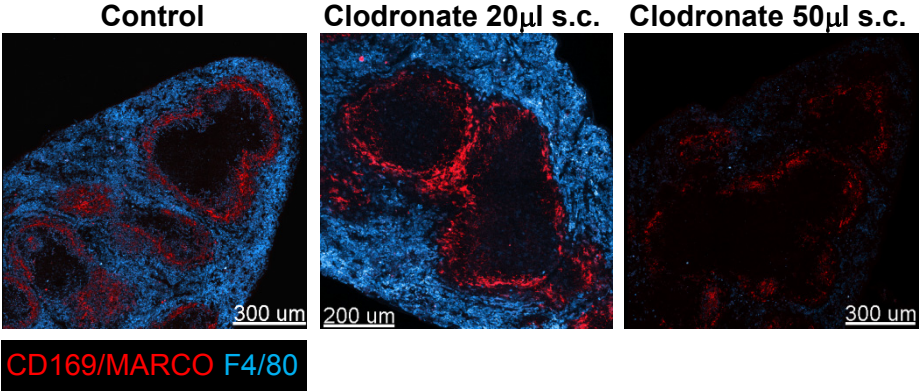

Figure S2

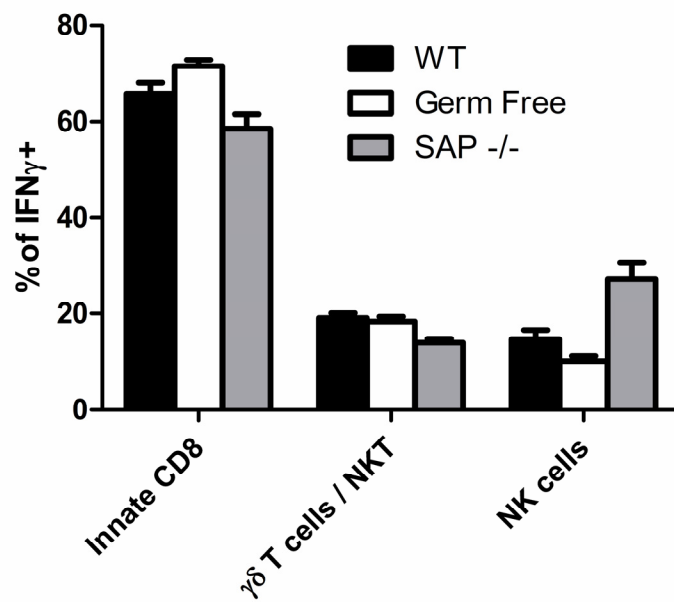

Figure S3

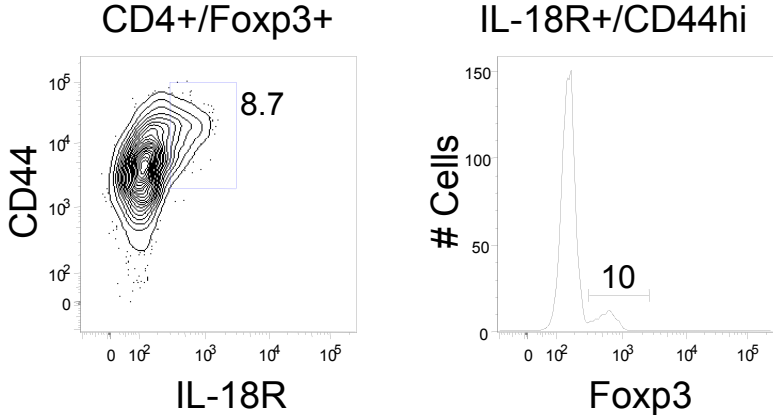

Figure S4

**A** CD11c YFP

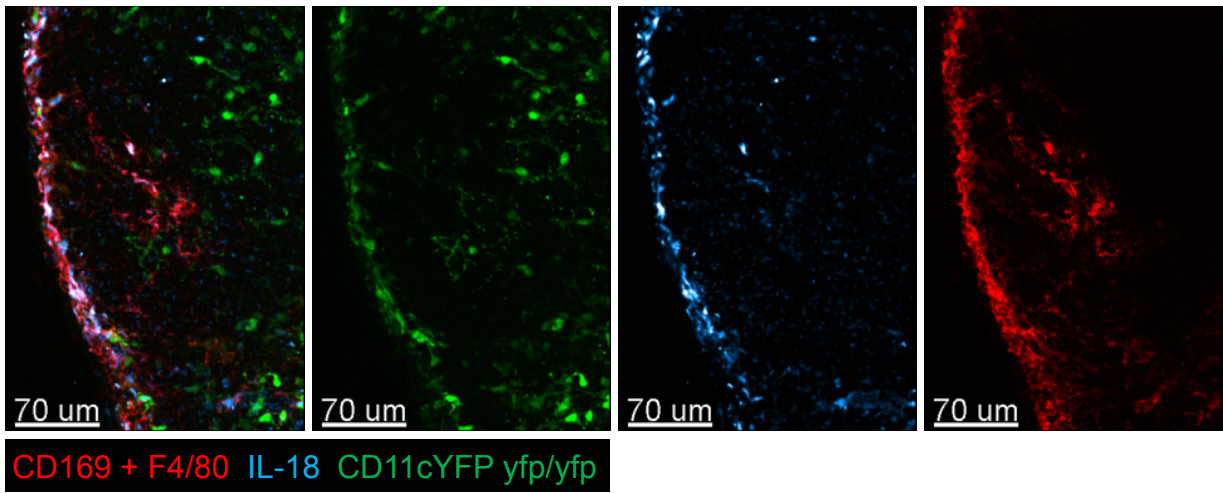

**B** IL-18 KO

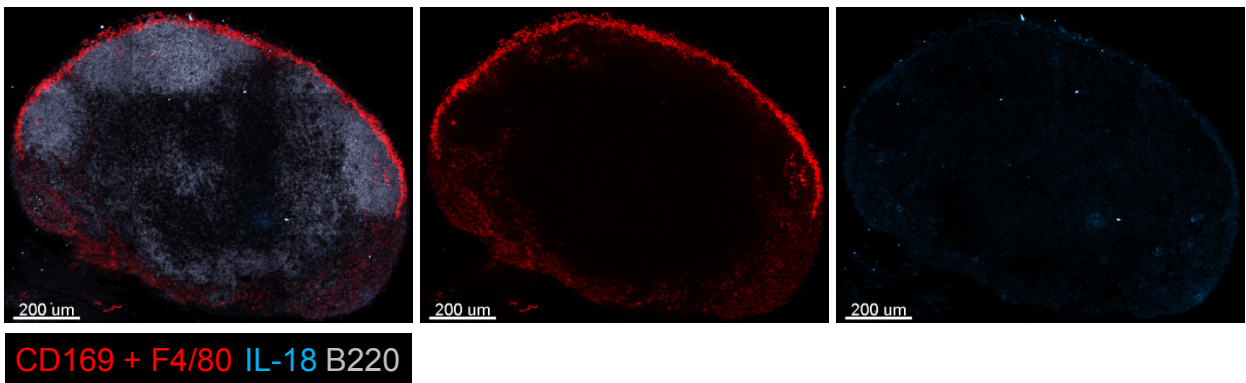

**C**

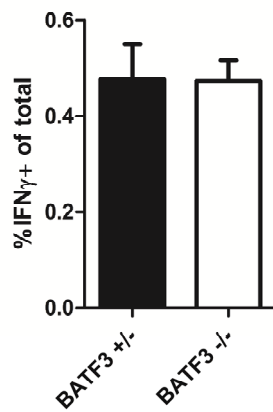

Figure S5

**A**

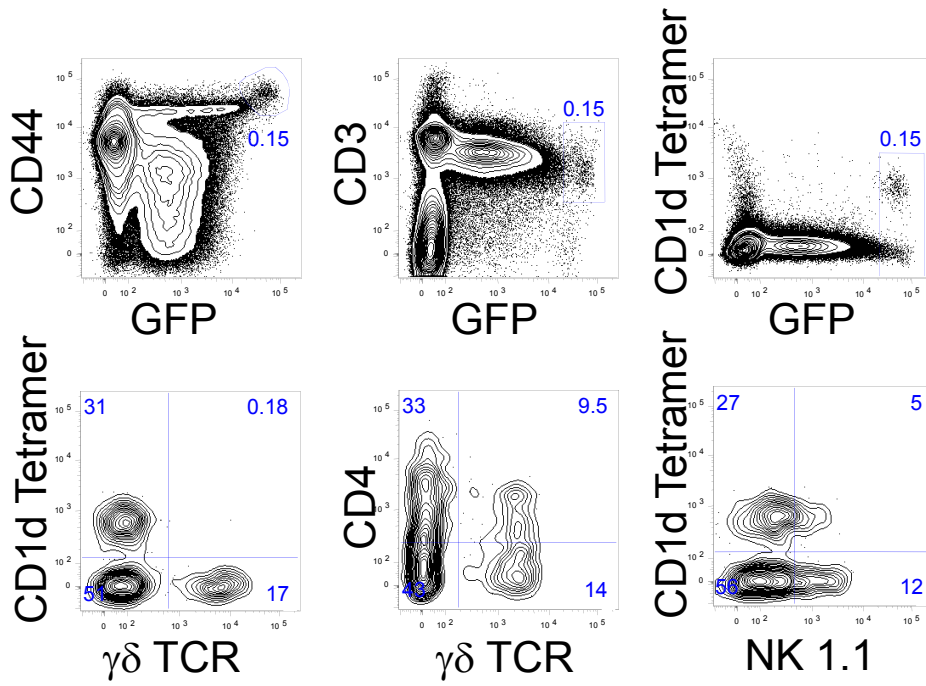

**B**

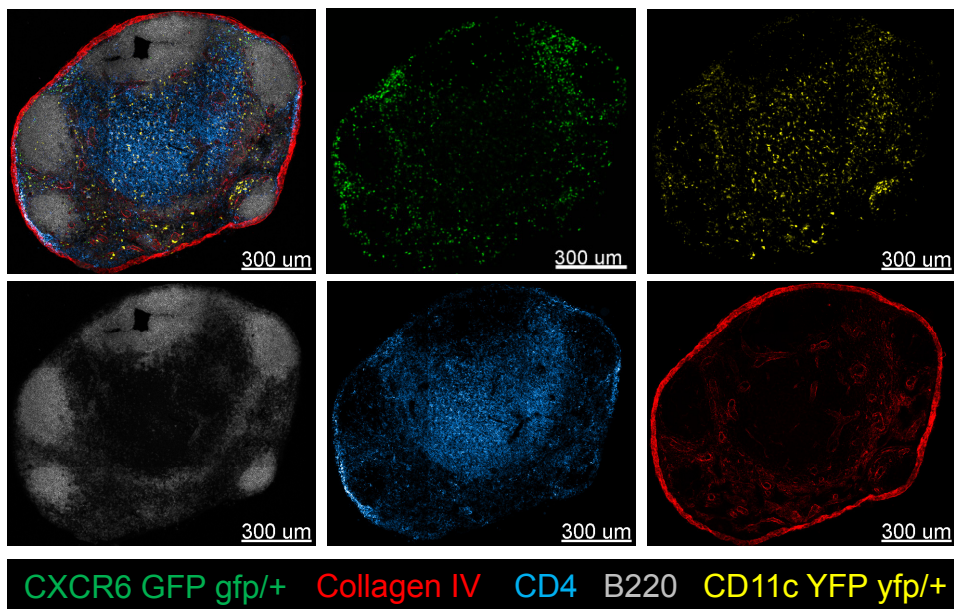

**C**

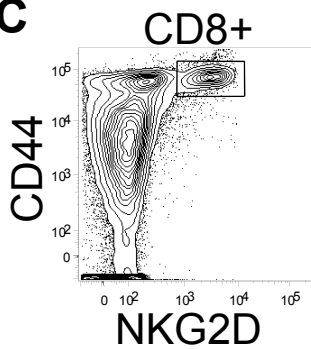

**D**

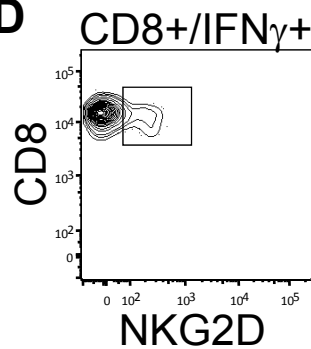

Figure S6

A

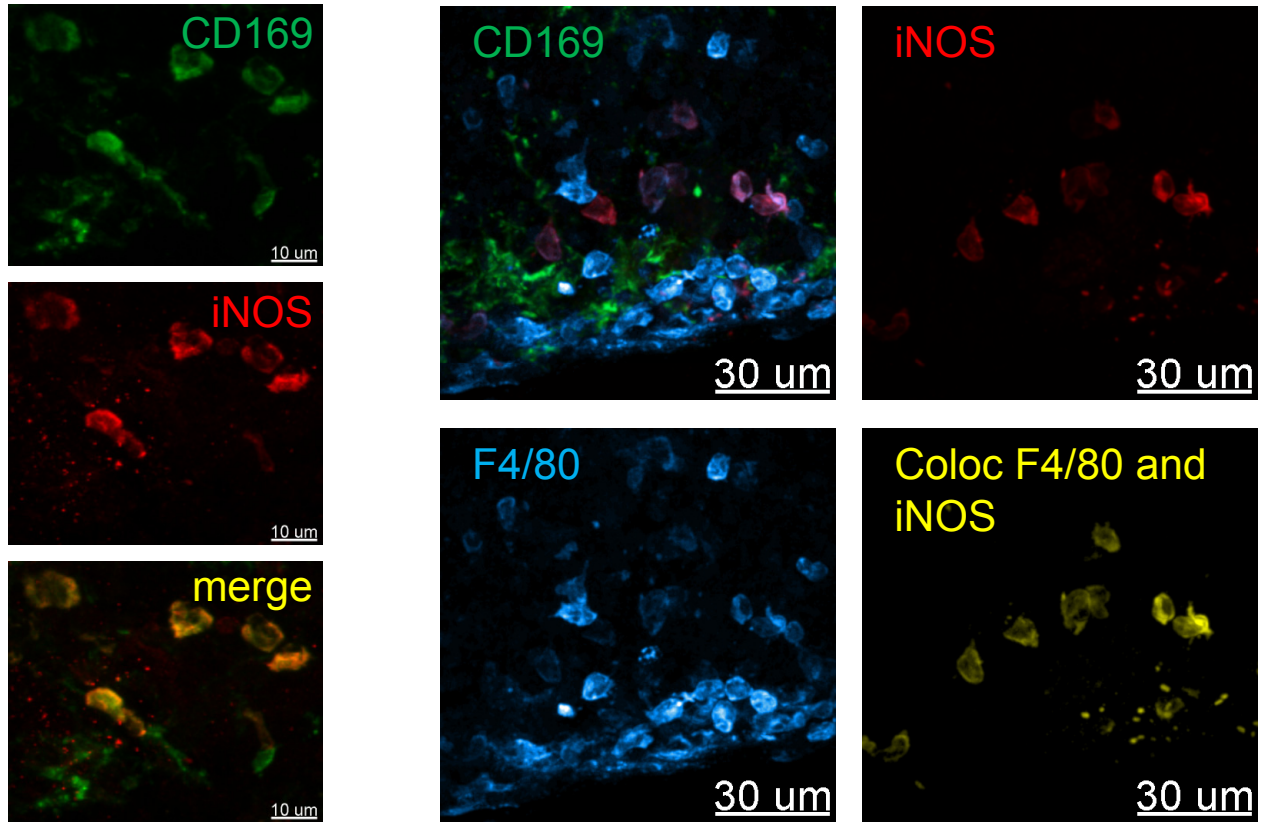

B

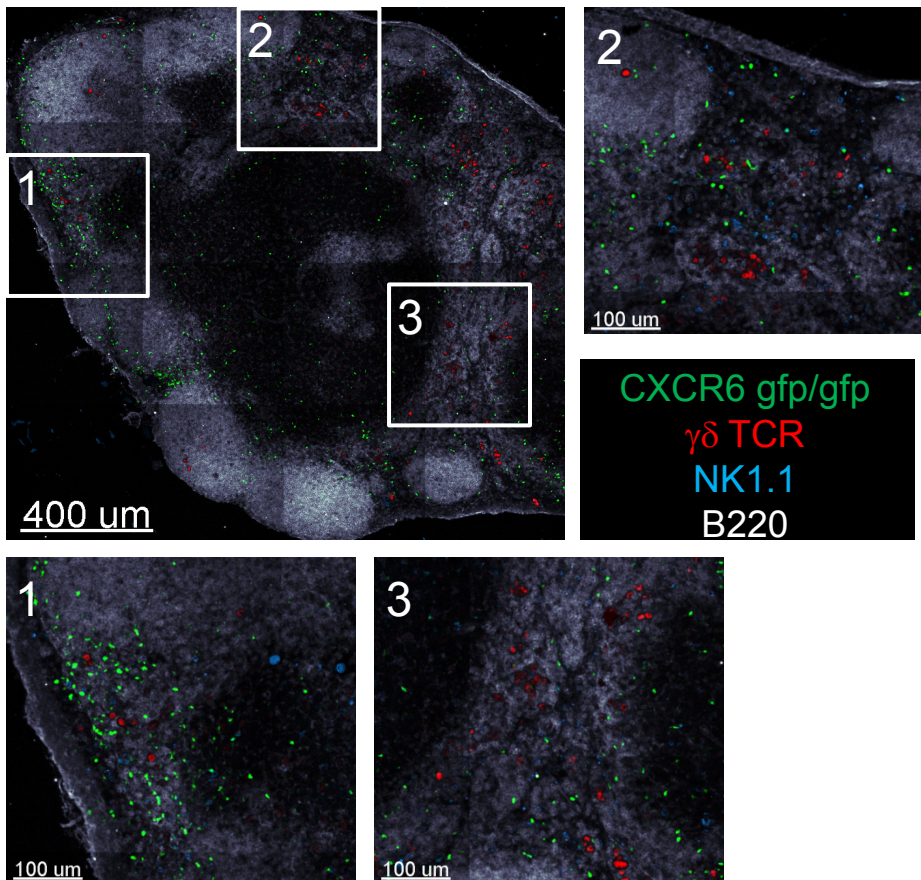

Figure S7

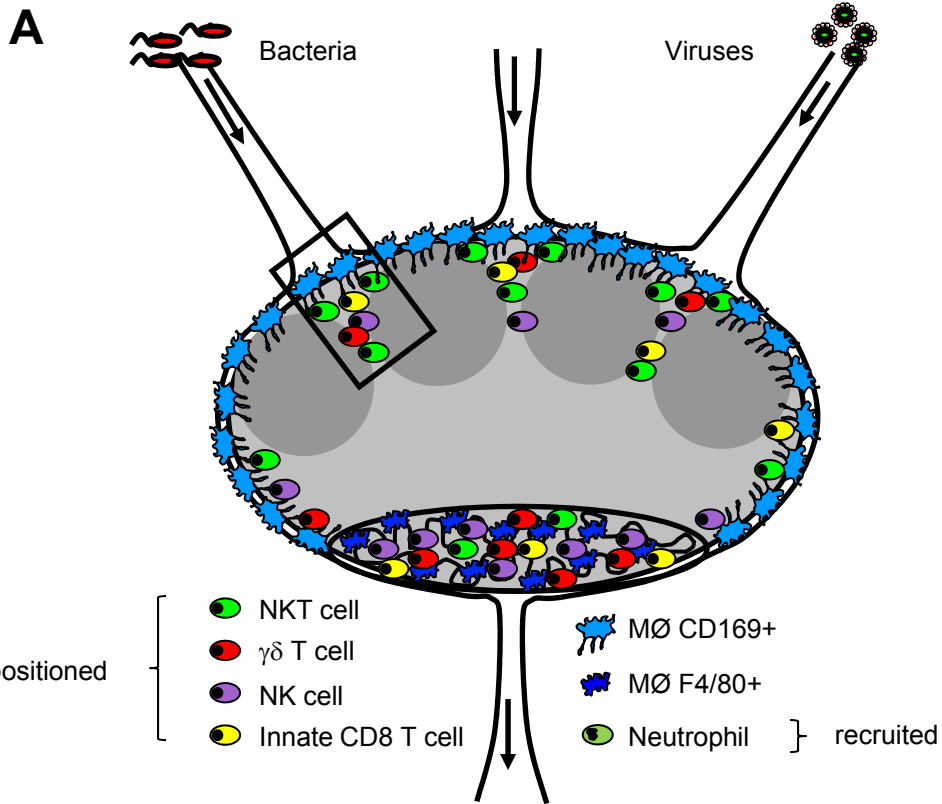

**B**

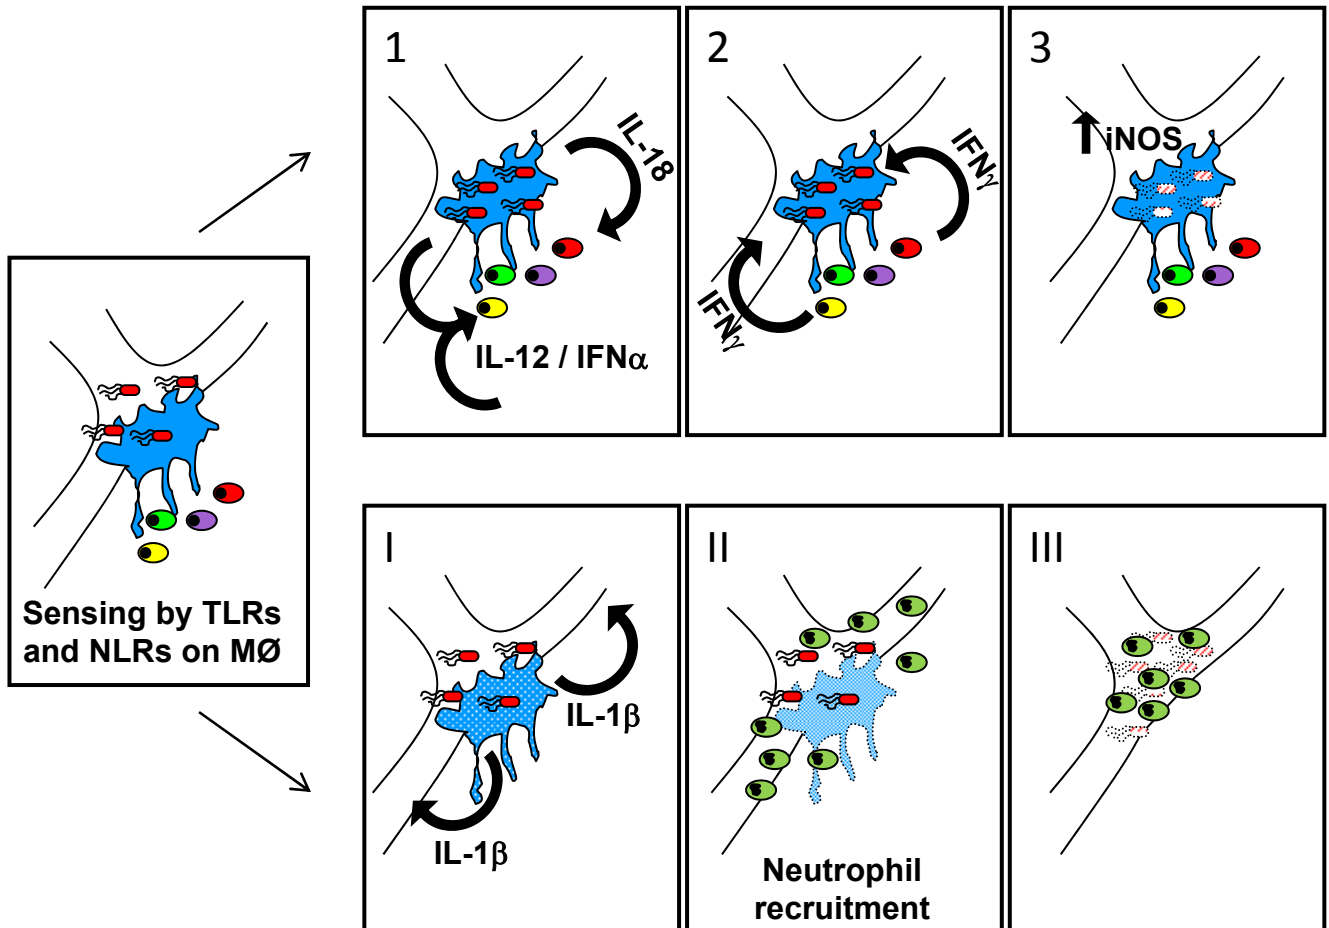

Supplement: NIHMS423179-supplement-S_fig.pdf [file NIHMS423179-supplement-S_fig.pdf]
